# Supplementary material
Source: MDPI journal article supplement (https://www.mdpi.com/2306-5338/8/3/115)

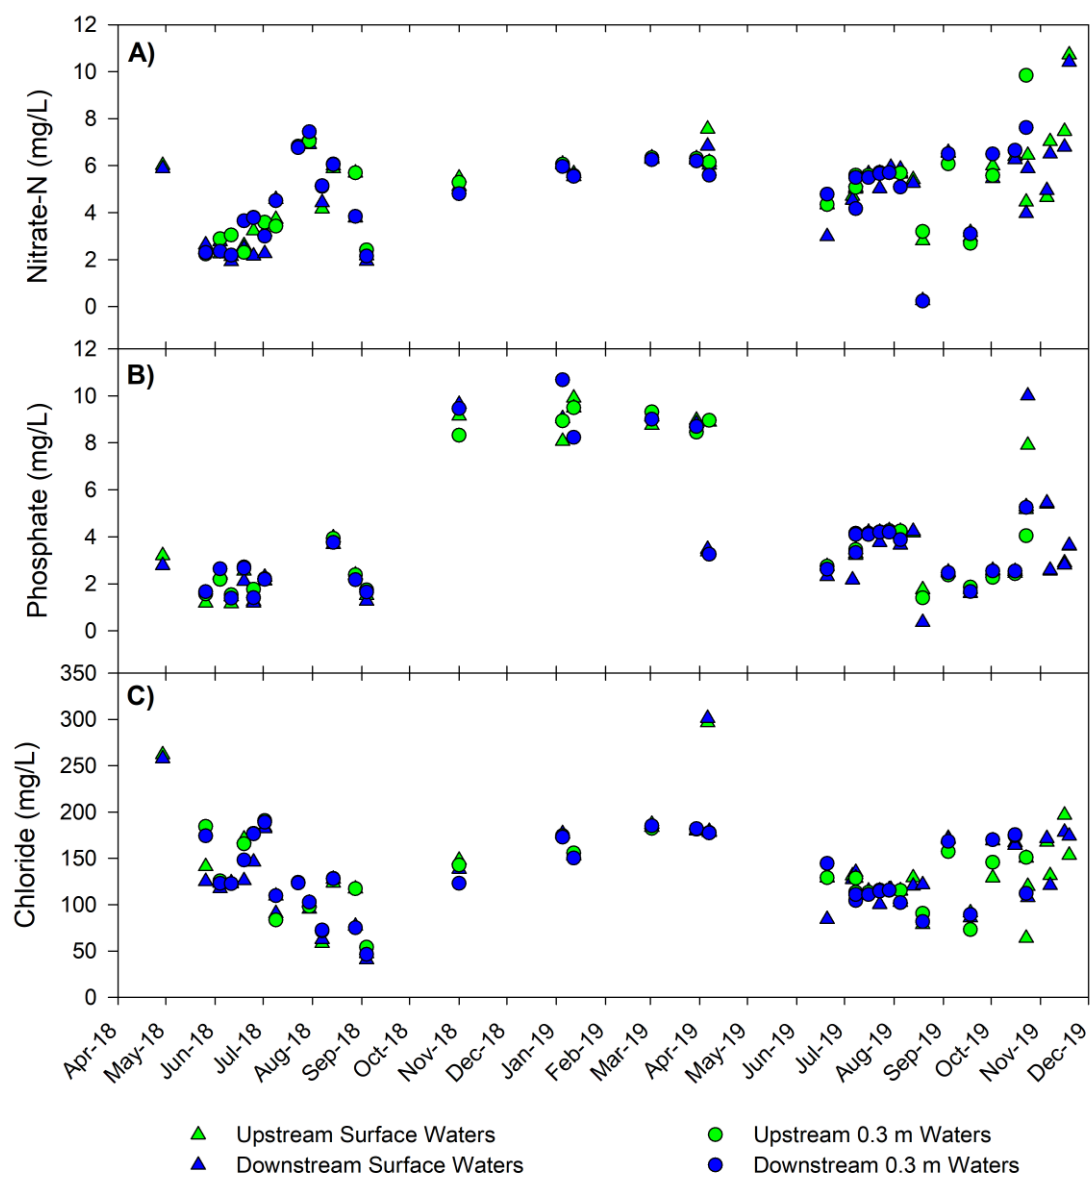

**Figure S1.** Time series data for (A) Nitrate as nitrogen, (B) Phosphate, and (C) Chloride.

Supplement: s1 [file s1]
